# Supplementary material for: Fitness costs of key point mutations that underlie acaricide target‐site resistance in the two‐spotted spider mite Tetranychus urticae
Source: PubMed Central journal article supplement (PMC6183448; doi:10.1111/eva.12643), 2018-05-20

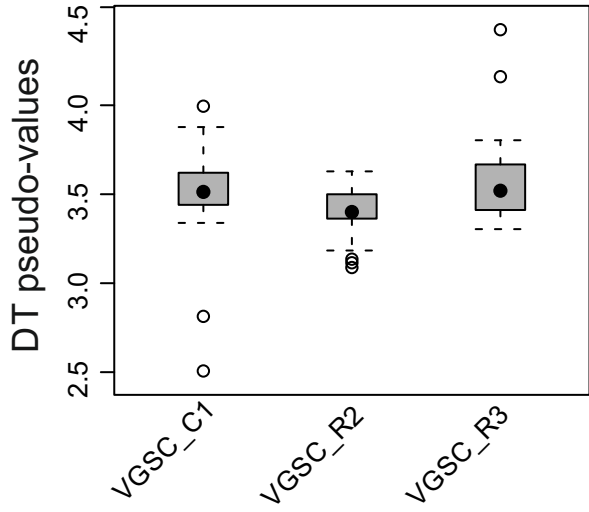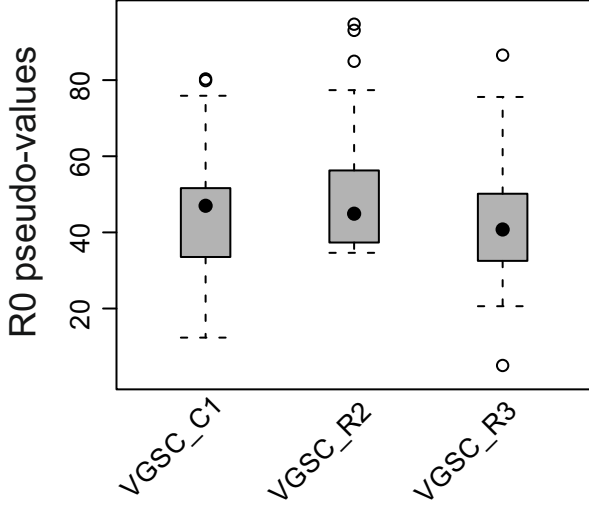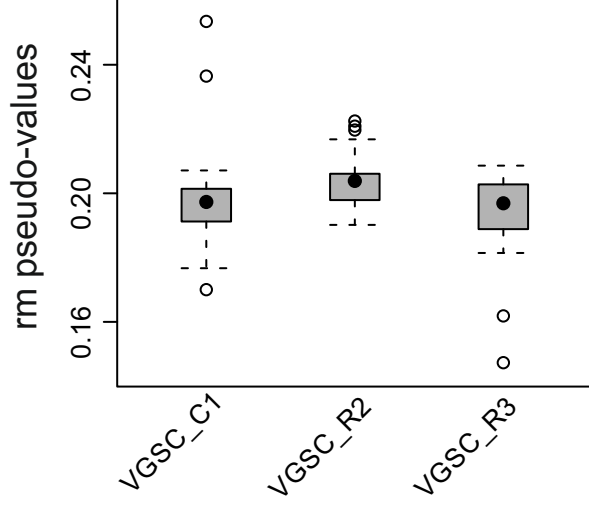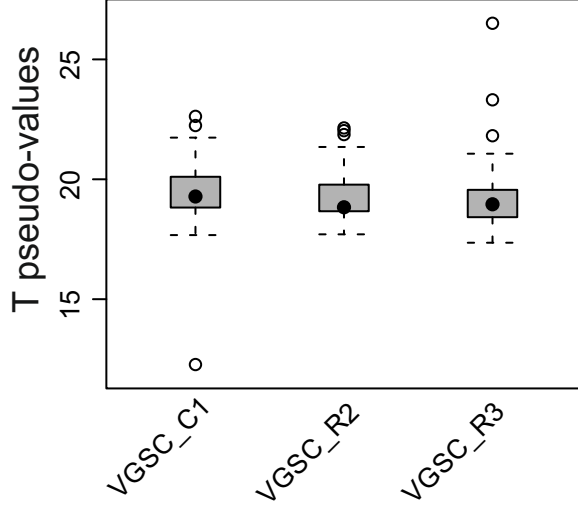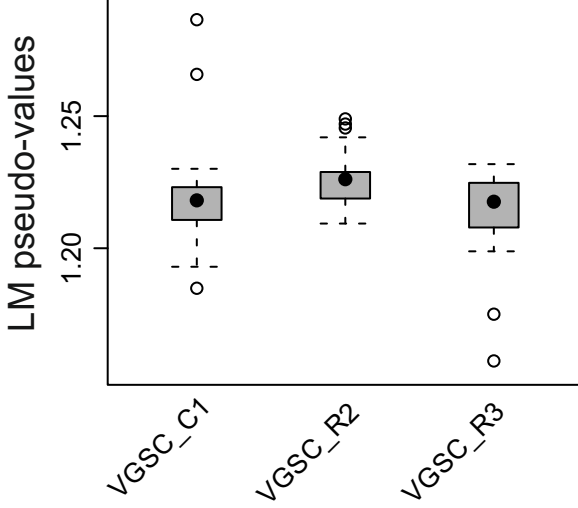

Supplement: EVA-11-1540-s002.pdf [file EVA-11-1540-s002.pdf]
